# Supplementary material for: A multiscale approach to triglycerides simulations: from atomistic to coarse-grained models and back
Source: Royal Society of Chemistry journal article supplement (doi:10.1039/c2fd20037f), 2012-01-01
Supplement: c2fd20037f.pdf [file c2fd20037f.pdf]

## ESI

# A Multiscale approach to triglycerides Simulations: From atomistic to coarse-grained models and back

5 Antonio Brasiello, Silvestro Crescitelli and Giuseppe Milano

### Planarity and Conformation parameters definition

To Analyse molecular conformations, two scalars P and C  
10 assessing planarity and conformations, respectively, have  
been defined. Planarity P is defined as follows:

$$P = \frac{\cos \theta'_{12} + \cos \theta'_{23}}{2} \text{ with:}$$

$$\theta'_{ij} = \begin{cases} \cos \theta_{ij} & \text{if } \cos \theta_{ij} \leq \frac{\pi}{2} \\ \cos \theta_{ij} - \pi & \text{if } \cos \theta_{ij} > \frac{\pi}{2} \end{cases}$$

For each coarse-grained molecule,  $\theta_{ij}$  are the angles formed by  
15 the plane identified by the two peripheral N beads and the  
extreme C bead of the central tail with those identified by the  
two peripheral N beads and the extreme C beads of the other  
two tails (see Fig. S1).

The parameter P belongs to the interval [0,1]: P = 0 means no  
20 planar conformation while P = 1 perfectly planar  
conformation. We choose to consider as planar, those  
molecules with planarity P exceeding the threshold of 0.8.

The conformational parameter C is defined as follows:

$$C = \frac{\cos \theta_{12} + \cos \theta_{23}}{2} \text{ if } P \square 1$$

25 The parameter C belongs to the interval [-1,1]: C = -1 means  
*tuning-fork* conformation, C = 0 means *chair* conformation,  
while C = 1 means *trident* conformation (see Fig. S1).  
Molecules have been classified as *tuning-forks* if  $C \in [-1, 0.8]$ ,  
as *chairs* if  $C \in [0.2, 0.2]$ , as *tridents* if  $C \in [0.8, 1]$ .

30 These definitions are easily extended to the atomistic  
configurations obtained through the backmapping by  
substituting the coordinates of the N and C beads with the  
corresponding united atoms coordinates .

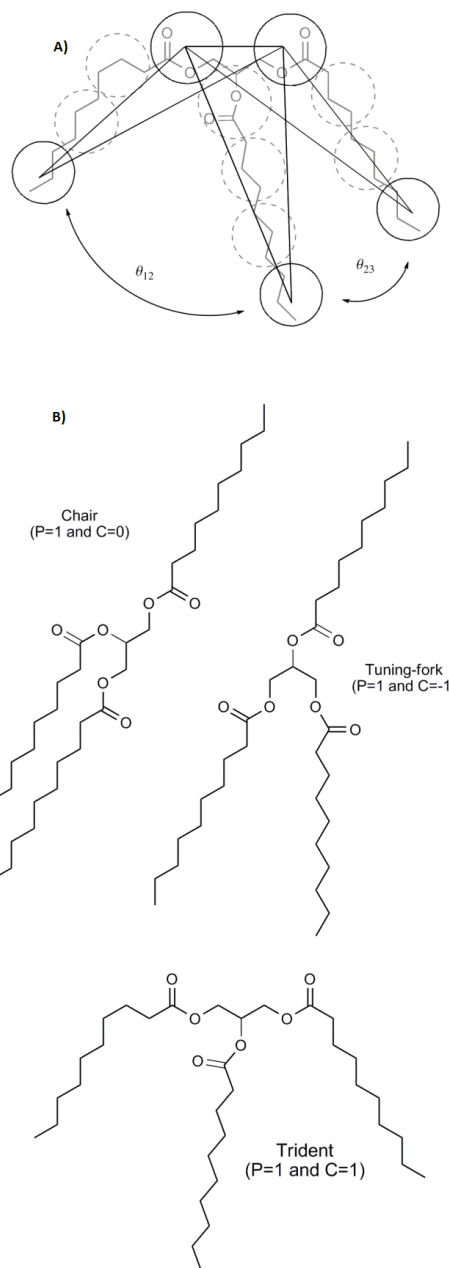

Fig. S1 A)  $\theta_{12}$  and  $\theta_{23}$  angles used to define planarity P and  
conformation C. B) Structure formulas for tridecanoic acid related  
50 to molecular planar conformations together with P and C  
values

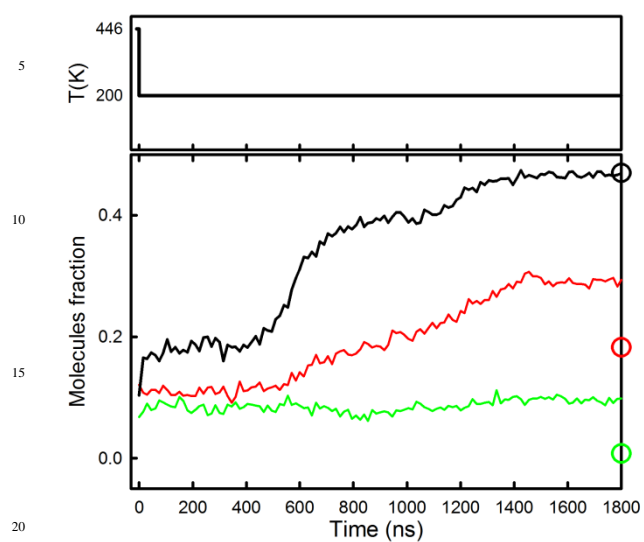

Fig. S2 Time evolution of tuning-fork (black line CG model, black empty circles reverse mapped model), chair (red line CG model, red empty circles reverse mapped model) and trident (green line CG model, green empty circles reverse mapped model) during time for system CG2.
